# Supplementary material for: The Role of Diet, Alcohol, BMI, and Physical Activity in Cancer Mortality: Summary Findings of the EPIC Study
Source: MDPI journal article supplement (doi:10.3390/nu13124293), 2021-11-28
Supplement: s1 [file s1]

## SUPPLEMENTARY MATERIAL

**Table S1.** Search terms used in databases.

| <b>MEDLINE (via PubMed)</b>                                                                                                                                                                                                                                                                                                                                             |
|-------------------------------------------------------------------------------------------------------------------------------------------------------------------------------------------------------------------------------------------------------------------------------------------------------------------------------------------------------------------------|
| ((("european prospective investigation into cancer" OR "EPIC study") AND ("cancer" OR "tumor" OR "tumour" OR "myelo*" OR "leukaemia" OR "leukemia" OR "neoplasm*" OR "lympho*" OR "carcinoma" OR "sarcoma") AND ("diet" OR "intake" OR "nutrients" OR "physical activity" OR "exercise" OR "BMI" OR "alcohol") AND ("mortality" OR "survival"))))                       |
| <b>Scopus</b>                                                                                                                                                                                                                                                                                                                                                           |
| TITLE-ABS-KEY ( ( "european prospective investigation into cancer" OR "EPIC study" ) AND ( "cancer" OR "tumor" OR "tumour" OR "myelo*" OR "leukaemia" OR "leukemia" OR "neoplasm*" OR "lympho*" OR "carcinoma" OR "sarcoma" ) AND ( "diet" OR "intake" OR "nutrients" OR "physical activity" OR "exercise" OR "BMI" OR "alcohol" ) AND ( "mortality" OR "survival" ) )  |
| <b>Web of Science</b>                                                                                                                                                                                                                                                                                                                                                   |
| ((("european prospective investigation into cancer" OR "EPIC study")) AND TEMA: (("cancer" OR "tumor" OR "tumour" OR "myelo*" OR "leukaemia" OR "leukemia" OR "neoplasm*" OR "lympho*" OR "carcinoma" OR "sarcoma")) AND TEMA: (("diet" OR "intake" OR "nutrients" OR "physical activity" OR "exercise" OR "BMI" OR "alcohol")) AND TEMA: (("mortality" OR "survival")) |

**Table S2.** Joanna Briggs Institute Critical Appraisal Tool for Cohort Studies.

|                                                                                                               | Yes                      | No                       | Unclear                  | Not applicable           |
|---------------------------------------------------------------------------------------------------------------|--------------------------|--------------------------|--------------------------|--------------------------|
| 1. Were the two groups similar and recruited from the same population?                                        | <input type="checkbox"/> | <input type="checkbox"/> | <input type="checkbox"/> | <input type="checkbox"/> |
| 2. Were the exposures measured similarly to assign people to both exposed and unexposed groups?               | <input type="checkbox"/> | <input type="checkbox"/> | <input type="checkbox"/> | <input type="checkbox"/> |
| 3. Was the exposure measured in a valid and reliable way?                                                     | <input type="checkbox"/> | <input type="checkbox"/> | <input type="checkbox"/> | <input type="checkbox"/> |
| 4. Were confounding factors identified?                                                                       | <input type="checkbox"/> | <input type="checkbox"/> | <input type="checkbox"/> | <input type="checkbox"/> |
| 5. Were strategies to deal with confounding factors stated?                                                   | <input type="checkbox"/> | <input type="checkbox"/> | <input type="checkbox"/> | <input type="checkbox"/> |
| 6. Were the groups/participants free of the outcome at the start of the study (or at the moment of exposure)? | <input type="checkbox"/> | <input type="checkbox"/> | <input type="checkbox"/> | <input type="checkbox"/> |
| 7. Were the outcomes measured in a valid and reliable way?                                                    | <input type="checkbox"/> | <input type="checkbox"/> | <input type="checkbox"/> | <input type="checkbox"/> |
| 8. Was the follow up time reported and sufficient to be long enough for outcomes to occur?                    | <input type="checkbox"/> | <input type="checkbox"/> | <input type="checkbox"/> | <input type="checkbox"/> |
| 9. Was follow up complete, and if not, were the reasons to loss to follow up described and explored?          | <input type="checkbox"/> | <input type="checkbox"/> | <input type="checkbox"/> | <input type="checkbox"/> |
| 10. Were strategies to address incomplete follow up utilized?                                                 | <input type="checkbox"/> | <input type="checkbox"/> | <input type="checkbox"/> | <input type="checkbox"/> |
| 11. Was appropriate statistical analysis used?                                                                | <input type="checkbox"/> | <input type="checkbox"/> | <input type="checkbox"/> | <input type="checkbox"/> |

**Table S3.** Quality assessment of included articles.

| Study                   | Item 1 | Item 2 | Item 3 | Item 4 | Item 5 | Item 6 | Item 7 | Item 8 | Item 9 | Item 10 | Item 11 | Quality Category |
|-------------------------|--------|--------|--------|--------|--------|--------|--------|--------|--------|---------|---------|------------------|
| Aasheim 2015 [60]       | N/A    | N/A    | ✓      | ✓      | ✓      | ✓      | ✓      | ✓      | ✓      | N/A     | ✓       | High             |
| Agudo 2017 [63]         | N/A    | N/A    | ✓      | ✓      | ✓      | ✓      | ✓      | ✓      | ✓      | N/A     | ✓       | High             |
| Appleby 2016 [43]       | N/A    | N/A    | ✓      | ✓      | ✓      | ✓      | ✓      | ✓      | ✓      | N/A     | ✓       | High             |
| Bamia 2010 [70]         | ✓      | ✓      | ✓      | ✓      | ✓      | ✓      | ✓      | ✓      | ✓      | N/A     | ✓       | High             |
| Bergmann 2013 [66]      | N/A    | N/A    | ✓      | ✓      | ✓      | ✓      | ✓      | ✓      | ✓      | N/A     | ✓       | High             |
| Buckland 2011 [41]      | N/A    | N/A    | ✓      | ✓      | ✓      | ✓      | ✓      | ✓      | ✓      | N/A     | ✓       | High             |
| Buckland 2012 [58]      | N/A    | N/A    | ✓      | ✓      | ✓      | ✓      | ✓      | ✓      | ✓      | N/A     | ✓       | High             |
| Burger 2012 [36]        | N/A    | N/A    | ✓      | ✓      | ✓      | ✓      | ✓      | ✓      | ✓      | N/A     | ✓       | High             |
| Chuang 2012 [37]        | N/A    | N/A    | ✓      | ✓      | ✓      | ✓      | ✓      | ✓      | ✓      | N/A     | ✓       | High             |
| Deschasaux 2020 [64]    | N/A    | N/A    | ✓      | ✓      | ✓      | ✓      | ✓      | ✓      | ✓      | N/A     | ✓       | High             |
| Engeset 2015 [39]       | N/A    | N/A    | ✓      | ✓      | ✓      | ✓      | ✓      | ✓      | ✓      | N/A     | ✓       | High             |
| Fedirko 2012 [50]       | N/A    | N/A    | ✓      | ✓      | ✓      | ✓      | ✓      | ✓      | ✓      | N/A     | ✓       | High             |
| Ferrari 2014 [65]       | N/A    | N/A    | ✓      | ✓      | ✓      | ✓      | ✓      | ✓      | ✓      | N/A     | ✓       | High             |
| González 2021 [76]      | N/A    | N/A    | ✓      | ✓      | ✓      | ✓      | ✓      | ✓      | ✓      | N/A     | ✓       | High             |
| Heath 2021 [68]         | N/A    | N/A    | ✓      | ✓      | ✓      | ✓      | ✓      | ✓      | ✓      | N/A     | ✓       | High             |
| Huerta 2016 [47]        | N/A    | N/A    | ✓      | ✓      | ✓      | ✓      | ✓      | ✓      | ✓      | N/A     | ✓       | High             |
| Kyrø 2015 [56]          | N/A    | N/A    | ✓      | ✓      | ✓      | ✓      | ✓      | ✓      | ✓      | N/A     | ✓       | High             |
| Lassale 2016 [42]       | N/A    | N/A    | ✓      | ✓      | ✓      | ✓      | ✓      | ✓      | ✓      | N/A     | ✓       | High             |
| Li 2011 [57]            | N/A    | N/A    | ✓      | ✓      | ✓      | ✓      | ✓      | ✓      | ✓      | N/A     | ✓       | High             |
| Li 2012 [55]            | N/A    | N/A    | ✓      | ✓      | ✓      | ✓      | ✓      | ✓      | ✓      | N/A     | ✓       | High             |
| Leenders 2013 [34]      | N/A    | N/A    | ✓      | ✓      | ✓      | ✓      | ✓      | ✓      | ✓      | N/A     | ✓       | High             |
| Mok 2019 [45]           | N/A    | N/A    | ✓      | ✓      | ✓      | ✓      | ✓      | ✓      | ✓      | N/A     | ✓       | High             |
| Mullee 2019 [67]        | N/A    | N/A    | ✓      | ✓      | ✓      | ✓      | ✓      | ✓      | ✓      | N/A     | ✓       | High             |
| Muller 2014 [51]        | ✓      | ✓      | ✓      | ✓      | ✓      | ✓      | ✓      | ✓      | ✓      | N/A     | ✓       | High             |
| Mulligan 2018 [74]      | N/A    | N/A    | ✓      | ✓      | ✓      | ✓      | ✓      | ✓      | ✓      | N/A     | ✓       | High             |
| Myint 2019 [54]         | N/A    | N/A    | ✓      | ✓      | ✓      | ✓      | ✓      | ✓      | ✓      | N/A     | ✓       | High             |
| Nimptsch 2010 [52]      | N/A    | N/A    | ✓      | ✓      | ✓      | ✓      | ✓      | ✓      | ✓      | N/A     | ✓       | High             |
| Nöthlings 2008 [33]     | N/A    | N/A    | ✓      | ✓      | ✓      | ✓      | ✓      | ✓      | ✓      | N/A     | ✓       | High             |
| Pala 2019 [40]          | N/A    | N/A    | ✓      | ✓      | ✓      | ✓      | ✓      | ✓      | ✓      | N/A     | ✓       | High             |
| Perez-Cornago 2017 [35] | N/A    | N/A    | ✓      | ✓      | ✓      | ✓      | ✓      | ✓      | ✓      | N/A     | ✓       | High             |
| Perez-Cornago 2020 [75] | N/A    | N/A    | ✓      | ✓      | ✓      | ✓      | ✓      | ✓      | ✓      | N/A     | ✓       | High             |
| Pischon 2008 [69]       | N/A    | N/A    | ✓      | ✓      | ✓      | ✓      | ✓      | ✓      | ✓      | N/A     | ✓       | High             |
| Rohrmann 2013 [61]      | N/A    | N/A    | ✓      | ✓      | ✓      | ✓      | ✓      | ✓      | ✓      | N/A     | ✓       | High             |

|                          |     |     |     |     |     |     |     |     |     |     |     |      |
|--------------------------|-----|-----|-----|-----|-----|-----|-----|-----|-----|-----|-----|------|
| Romaguera 2015 [49]      | N/A | N/A | ✓   | ✓   | ✓   | ✓   | ✓   | ✓   | ✓   | N/A | ✓   | High |
| Sahlqvist 2013 [46]      | N/A | N/A | ✓   | ✓   | ✓   | ✓   | ✓   | ✓   | ✓   | N/A | ✓   | High |
| Sawada 2017 [71]         | N/A | N/A | ✓   | ✓   | ✓   | ✓   | ✓   | ✓   | ✓   | N/A | ✓   | High |
| Segovia-Siapco 2018 [44] | N/A | N/A | ✓   | ✓   | ✓   | ✓   | ✓   | ✓   | ✓   | N/A | ✓   | High |
| Sluik 2011 [72]          | N/A | N/A | ✓   | ✓   | ✓   | ✓   | ✓   | ✓   | ✓   | N/A | ✓   | High |
| Sluik 2012 [77]          | N/A | N/A | ✓   | ✓   | ✓   | ✓   | ✓   | ✓   | ✓   | N/A | ✓   | High |
| Vergnaud 2013 [48]       | N/A | N/A | ✓   | ✓   | ✓   | ✓   | ✓   | ✓   | ✓   | N/A | ✓   | High |
| Ward 2016 [38]           | N/A | N/A | ✓   | ✓   | ✓   | ✓   | ✓   | ✓   | ✓   | N/A | ✓   | High |
| Wijndaele 2011 [73]      | N/A | N/A | ✓   | ✓   | ✓   | ✓   | ✓   | ✓   | ✓   | N/A | ✓   | High |
| Zamora-Ros 2013 [59]     | N/A | N/A | ✓   | ✓   | ✓   | ✓   | ✓   | ✓   | ✓   | N/A | ✓   | High |
| Zamora-Ros 2019 [62]     | N/A | N/A | ✓   | ✓   | ✓   | ✓   | ✓   | ✓   | ✓   | N/A | ✓   | High |
| Zwakenberg 2017 [53]     | N/A | N/A | ✓   | ✓   | ✓   | ✓   | ✓   | ✓   | ✓   | N/A | ✓   | High |
| <b>Criterion Score %</b> | 100 | 100 | 100 | 100 | 100 | 100 | 100 | 100 | 100 | N/A | 100 |      |

Note that the criterion score is calculated by dividing the number of studies meeting one criterion by the total number of studies . ✓: meet the methodological quality criterion; ✖: not meet the methodological quality criterion.; ?: unclear; N/A: not applicable.
